# Supplementary material for: Synergistic engineering of ultraviolet metal-free crystals with exceptional birefringence via pyridine-derived dimers
Source: Royal Society of Chemistry journal article supplement (doi:10.1039/d5sc00112a), 2025-01-01
Supplement: d5sc00112a1.pdf [file d5sc00112a1.pdf]

**Electronic Supplementary Information (ESI) for**

**Synergistic engineering of ultraviolet metal-free crystals with exceptional birefringence via  
pyridine-derived dimers**

Jiachen Lu and Kang Min Ok\*

*Department of Chemistry, Sogang University, 35 Baekbeom-ro, Mapo-gu, Seoul 04107, Korea*

E-mail: kmok@sogang.ac.kr

**Table S1.** Crystallographic data for **1** and **2**.

| Empirical formula                                                 | C <sub>15</sub> H <sub>15</sub> N <sub>3</sub> O <sub>5</sub> S ( <b>1</b> )                 | C <sub>10</sub> H <sub>11</sub> N <sub>3</sub> O <sub>3</sub> S ( <b>2</b> )                 |
|-------------------------------------------------------------------|----------------------------------------------------------------------------------------------|----------------------------------------------------------------------------------------------|
| Formula weight                                                    | 349.36                                                                                       | 253.28                                                                                       |
| Temperature/K                                                     | 303.00                                                                                       | 303.00                                                                                       |
| CCDC number                                                       | 2393748                                                                                      | 2393642                                                                                      |
| Crystal system                                                    | monoclinic                                                                                   | orthorhombic                                                                                 |
| Space group                                                       | <i>P</i> 2 <sub>1</sub> / <i>c</i>                                                           | <i>Pbcn</i>                                                                                  |
| <i>a</i> /Å                                                       | 17.5972(5)                                                                                   | 7.2257(4)                                                                                    |
| <i>b</i> /Å                                                       | 7.0455(2)                                                                                    | 13.4248(8)                                                                                   |
| <i>c</i> /Å                                                       | 12.8268(3)                                                                                   | 24.3820(14)                                                                                  |
| $\alpha$ /°                                                       | 90                                                                                           | 90                                                                                           |
| $\beta$ /°                                                        | 90.8810(10)                                                                                  | 90                                                                                           |
| $\gamma$ /°                                                       | 90                                                                                           | 90                                                                                           |
| Volume/Å <sup>3</sup>                                             | 1590.09(7)                                                                                   | 2365.1(2)                                                                                    |
| <i>Z</i>                                                          | 4                                                                                            | 8                                                                                            |
| $\rho_{\text{calc}}$ g/cm <sup>3</sup>                            | 1.459                                                                                        | 1.423                                                                                        |
| $\mu$ /mm <sup>-1</sup>                                           | 0.235                                                                                        | 0.274                                                                                        |
| <i>F</i> (000)                                                    | 728.0                                                                                        | 1056                                                                                         |
| Radiation                                                         | MoK $\alpha$ ( $\lambda$ = 0.71073)                                                          | MoK $\alpha$ ( $\lambda$ = 0.71073)                                                          |
| 2 $\theta$ range/°                                                | 4.63 to 56.61                                                                                | 6.07 to 56.766                                                                               |
| Index ranges                                                      | -23 $\leq$ <i>h</i> $\leq$ 23, -9 $\leq$ <i>k</i> $\leq$ 9,<br>-17 $\leq$ <i>l</i> $\leq$ 17 | -9 $\leq$ <i>h</i> $\leq$ 9, -17 $\leq$ <i>k</i> $\leq$ 17,<br>-32 $\leq$ <i>l</i> $\leq$ 32 |
| Reflections collected                                             | 35676                                                                                        | 27477                                                                                        |
| Independent reflections                                           | 3957 [ <i>R</i> <sub>int</sub> = 0.0581, <i>R</i> <sub>sigma</sub> = 0.0305]                 | 2963 [ <i>R</i> <sub>int</sub> = 0.0786, <i>R</i> <sub>sigma</sub> = 0.0460]                 |
| Data/restraints/parameters                                        | 3957/0/217                                                                                   | 2963/0/198                                                                                   |
| Goodness-of-fit on <i>F</i> <sup>2</sup>                          | 1.136                                                                                        | 1.209                                                                                        |
| Final <i>R</i> indexes [ <i>I</i> $\geq$ 2 $\sigma$ ( <i>I</i> )] | <i>R</i> <sub>1</sub> = 0.0524, <i>wR</i> <sub>2</sub> = 0.1062                              | <i>R</i> <sub>1</sub> = 0.0779, <i>wR</i> <sub>2</sub> = 0.1283                              |
| Final <i>R</i> indexes [all data]                                 | <i>R</i> <sub>1</sub> = 0.0762, <i>wR</i> <sub>2</sub> = 0.1195                              | <i>R</i> <sub>1</sub> = 0.1243, <i>wR</i> <sub>2</sub> = 0.1474                              |
| Largest diff. peak/hole / e Å <sup>-3</sup>                       | 0.22/-0.33                                                                                   | 0.23/-0.31                                                                                   |

$$R_1 = \frac{\sum ||F_o| - |F_c||}{\sum |F_o|} \text{ and } wR_2 = [\frac{\sum w (F_o^2 - F_c^2)^2}{\sum w F_o^4}]^{1/2} \text{ for } F_o^2 > 2\sigma(F_o^2)$$

**Table S2.** Atomic coordinates ( $\times 10^4$ ) and equivalent isotropic displacement parameters ( $\text{\AA}^2 \times 10^3$ ) for compound 1.  $U_{\text{eq}}$  is defined as 1/3 of the trace of the orthogonalized  $U_{ij}$  tensor.

| Atom | x           | y         | z          | $U_{\text{eq}}$ |
|------|-------------|-----------|------------|-----------------|
| S1   | 3484.7(3)   | 1218.5(8) | 4363.5(4)  | 38.54(15)       |
| O5   | 3425.2(9)   | 1404(3)   | 5488.2(12) | 54.2(4)         |
| O3   | 3762.0(9)   | -620(2)   | 4046.8(15) | 57.4(5)         |
| O2   | 9337.9(8)   | 3264(3)   | 3598.3(13) | 57.5(5)         |
| O4   | 2795.5(8)   | 1786(3)   | 3822.0(14) | 58.5(5)         |
| N3   | 5494.3(9)   | 3831(3)   | 4053.9(14) | 40.3(4)         |
| O1   | 9645.3(9)   | 3285(3)   | 1749.6(13) | 68.3(6)         |
| N2   | 7085.5(10)  | 3431(3)   | 4204.6(15) | 46.5(5)         |
| N1   | 11884.0(10) | 3354(3)   | 1067.4(16) | 48.6(5)         |
| C14  | 4190.7(10)  | 2870(3)   | 3983.2(15) | 33.5(4)         |
| C15  | 4940.2(11)  | 2630(3)   | 4306.1(16) | 36.7(4)         |
| C11  | 5308.7(13)  | 5330(3)   | 3474.4(17) | 45.8(5)         |
| C13  | 4012.3(13)  | 4426(4)   | 3372.5(18) | 47.5(5)         |
| C6   | 8617.5(11)  | 3337(3)   | 3774.6(17) | 40.8(5)         |
| C8   | 7314.3(12)  | 3632(4)   | 3218.5(19) | 47.9(5)         |
| C7   | 8064.5(12)  | 3598(3)   | 2978.6(18) | 44.8(5)         |
| C10  | 8353.0(12)  | 3155(3)   | 4800.1(17) | 45.0(5)         |
| C4   | 10930.9(12) | 3438(4)   | 2326.7(18) | 51.3(6)         |
| C2   | 10610.8(13) | 3183(4)   | 508.6(19)  | 52.2(6)         |
| C9   | 7593.1(13)  | 3199(4)   | 4985.7(18) | 48.6(6)         |
| C3   | 10365.5(12) | 3299(4)   | 1543.8(18) | 48.0(6)         |
| C5   | 11677.8(13) | 3447(4)   | 2062(2)    | 53.2(6)         |
| C12  | 4579.7(14)  | 5679(4)   | 3119.2(19) | 54.4(6)         |
| C1   | 11361.4(13) | 3230(4)   | 298(2)     | 51.4(6)         |

**Table S3.** Atomic coordinates ( $\times 10^4$ ) and equivalent isotropic displacement parameters ( $\text{\AA}^2 \times 10^3$ ) of non-hydrogen atoms for compound **2**.  $U_{\text{eq}}$  is defined as 1/3 of the trace of the orthogonalised  $U_{ij}$  tensor.

| Atom | <i>x</i>   | <i>y</i>   | <i>z</i>   | $U_{\text{eq}}$ |
|------|------------|------------|------------|-----------------|
| S1   | 8764.5(13) | 5435.5(6)  | 6033.0(3)  | 44.9(2)         |
| O3   | 8662(4)    | 4360.0(16) | 5992.4(10) | 55.1(7)         |
| O1   | 10584(4)   | 5818(2)    | 5902.7(10) | 67.5(8)         |
| O2   | 8032(5)    | 5805(2)    | 6548.1(9)  | 71.6(9)         |
| N3   | 6800(4)    | 6384(2)    | 4584.7(11) | 50.0(7)         |
| N1   | 7627(5)    | 7094(3)    | 1807.5(12) | 57.8(9)         |
| N2   | 7392(5)    | 6584(3)    | 3456.5(13) | 57.8(9)         |
| C9   | 7257(5)    | 5898(2)    | 5517.4(12) | 39.3(7)         |
| C10  | 7899(5)    | 6075(3)    | 4993.2(13) | 43.0(8)         |
| C3   | 7531(5)    | 6924(3)    | 2347.5(12) | 44.3(8)         |
| C4   | 7673(6)    | 5956(3)    | 2561.5(15) | 52.6(9)         |
| C8   | 5395(6)    | 6041(3)    | 5623.4(16) | 54.2(10)        |
| C2   | 7269(6)    | 7704(3)    | 2720.9(14) | 52.3(9)         |
| C5   | 7615(6)    | 5812(3)    | 3110.5(16) | 59.0(10)        |
| C6   | 5018(6)    | 6525(3)    | 4698.2(17) | 57.1(10)        |
| C1   | 7200(6)    | 7507(3)    | 3266.9(15) | 57.9(10)        |
| C7   | 4262(6)    | 6361(3)    | 5207.0(19) | 62.9(11)        |

**Table S4.** Bond lengths for compound **1** and **2**.

| Bond     | Length/Å   | Bond    | Length/Å |
|----------|------------|---------|----------|
| <b>1</b> |            |         |          |
| S1-O5    | 1.4539(16) | C14-C15 | 1.387(3) |
| S1-O3    | 1.4447(17) | C14-C13 | 1.381(3) |
| S1-O4    | 1.4448(16) | C11-C12 | 1.377(3) |
| S1-C14   | 1.776(2)   | C13-C12 | 1.376(3) |
| O2-C6    | 1.292(2)   | C6-C7   | 1.412(3) |
| N3-C15   | 1.335(3)   | C6-C10  | 1.408(3) |
| N3-C11   | 1.330(3)   | C8-C7   | 1.360(3) |
| O1-C3    | 1.298(3)   | C10-C9  | 1.362(3) |
| N2-C8    | 1.341(3)   | C4-C3   | 1.406(3) |
| N2-C9    | 1.342(3)   | C4-C5   | 1.362(3) |
| N1-C5    | 1.334(3)   | C2-C3   | 1.405(3) |
| N1-C1    | 1.341(3)   | C2-C1   | 1.353(3) |
| <b>2</b> |            |         |          |
| S1-O3    | 1.449(2)   | C9-C10  | 1.381(4) |
| S1-O1    | 1.447(3)   | C9-C8   | 1.383(5) |
| S1-O2    | 1.450(2)   | C3-C4   | 1.405(5) |
| S1-C9    | 1.776(3)   | C3-C2   | 1.400(5) |
| N3-C10   | 1.340(4)   | C4-C5   | 1.353(5) |
| N3-C6    | 1.330(5)   | C8-C7   | 1.373(6) |
| N1-C3    | 1.338(4)   | C2-C1   | 1.358(5) |
| N2-C5    | 1.347(5)   | C6-C7   | 1.374(6) |
| N2-C1    | 1.329(5)   |         |          |

**Table S5.** Bond angles for compound **1** and **2**.

| Bond        | Angle/°    | Bond        | Angle/°    |
|-------------|------------|-------------|------------|
| <b>1</b>    |            |             |            |
| O5-S1-C14   | 105.96(9)  | O2-C6-C7    | 123.1(2)   |
| O3-S1-O5    | 112.92(11) | O2-C6-C10   | 119.9(2)   |
| O3-S1-O4    | 113.43(11) | C10-C6-C7   | 116.97(19) |
| O3-S1-C14   | 105.64(9)  | N2-C8-C7    | 121.2(2)   |
| O4-S1-O5    | 112.30(10) | C8-C7-C6    | 119.9(2)   |
| O4-S1-C14   | 105.80(10) | C9-C10-C6   | 120.1(2)   |
| C11-N3-C15  | 117.73(18) | C5-C4-C3    | 119.8(2)   |
| C8-N2-C9    | 120.74(18) | C1-C2-C3    | 120.2(2)   |
| C5-N1-C1    | 120.90(19) | N2-C9-C10   | 121.1(2)   |
| C15-C14-S1  | 120.26(16) | O1-C3-C4    | 122.5(2)   |
| C13-C14-S1  | 121.47(16) | O1-C3-C2    | 120.4(2)   |
| C13-C14-C15 | 118.27(19) | C2-C3-C4    | 117.0(2)   |
| N3-C15-C14  | 123.03(19) | N1-C5-C4    | 121.0(2)   |
| N3-C11-C12  | 123.1(2)   | C13-C12-C11 | 118.9(2)   |
| C12-C13-C14 | 119.0(2)   | N1-C1-C2    | 121.0(2)   |
| <b>2</b>    |            |             |            |
| O3-S1-O2    | 112.41(16) | N3-C10-C9   | 122.9(3)   |
| O3-S1-C9    | 105.59(15) | N1-C3-C4    | 121.3(3)   |
| O1-S1-O3    | 112.66(17) | N1-C3-C2    | 121.3(3)   |
| O1-S1-O2    | 113.59(18) | C2-C3-C4    | 117.4(3)   |
| O1-S1-C9    | 106.13(15) | C5-C4-C3    | 119.8(4)   |
| O2-S1-C9    | 105.65(16) | C7-C8-C9    | 119.0(4)   |
| C6-N3-C10   | 117.6(3)   | C1-C2-C3    | 119.8(4)   |
| C1-N2-C5    | 120.8(3)   | N2-C5-C4    | 120.9(4)   |
| C10-C9-S1   | 120.6(3)   | N3-C6-C7    | 123.4(4)   |
| C10-C9-C8   | 118.4(3)   | N2-C1-C2    | 121.2(4)   |
| C8-C9-S1    | 120.9(3)   | C8-C7-C6    | 118.7(4)   |

**Table S6.** Hydrogen bonds for compound **1** and **2**.

| D-H...A                  | d(D-A)/Å | D-H...A/° |
|--------------------------|----------|-----------|
| <b>1</b>                 |          |           |
| O2-H2...O1               | 2.440(2) | 166.5     |
| N2-H2A...N3              | 2.818(2) | 157.0     |
| N1-H1...O5 <sup>1</sup>  | 2.828(2) | 175.1     |
| <b>2</b>                 |          |           |
| N1-H1A...O3 <sup>2</sup> | 2.884(4) | 168(4)    |
| N1-H1B...O2 <sup>3</sup> | 2.930(5) | 167(3)    |
| N2-H2...N3               | 2.797(4) | 167(4)    |

Symmetry codes: <sup>1</sup>1+X,1/2-Y,-1/2+Z; <sup>2</sup>+X,1-Y,-1/2+Z; <sup>3</sup>3/2-X,3/2-Y,-1/2+Z**Table S7.** Comparison of experimental birefringence among metal-free compounds containing single six-membered rings in short-wave ultraviolet region.

| Number | Compound                                                                                                      | UV cutoff edge      | Birefringence | Reference |
|--------|---------------------------------------------------------------------------------------------------------------|---------------------|---------------|-----------|
| 1      | [(4-HP)(4-H <sub>2</sub> P)][3-pySO <sub>3</sub> ]                                                            | 279 nm <sup>b</sup> | 0.443 @546 nm | This work |
| 2      | (C <sub>6</sub> H <sub>6</sub> NO <sub>2</sub> )Cl                                                            | 262 nm <sup>b</sup> | 0.363 @550 nm | 1         |
| 3      | (C <sub>7</sub> H <sub>4</sub> NO <sub>4</sub> )(IO <sub>3</sub> )                                            | 269 nm <sup>b</sup> | 0.350 @546 nm | 2         |
| 4      | (C <sub>3</sub> H <sub>7</sub> N <sub>6</sub> )F·H <sub>2</sub> O                                             | 220 nm <sup>b</sup> | 0.337@550 nm  | 3         |
| 5      | (C <sub>3</sub> N <sub>6</sub> H <sub>7</sub> )BF <sub>4</sub> ·H <sub>2</sub> O                              | 244 nm <sup>a</sup> | 0.310 @546 nm | 4         |
| 6      | β-(C <sub>3</sub> H <sub>7</sub> N <sub>6</sub> ) <sub>2</sub> Cl <sub>2</sub> ·H <sub>2</sub> O              | 230 nm <sup>b</sup> | 0.299 @550 nm | 3         |
| 7      | (3CP)(H <sub>2</sub> PO <sub>4</sub> )                                                                        | 270 nm <sup>b</sup> | 0.284 @546 nm | 5         |
| 8      | 2(C <sub>3</sub> H <sub>7</sub> N <sub>6</sub> )·2Cl·H <sub>2</sub> O                                         | 245 nm <sup>b</sup> | 0.248 @546 nm | 6         |
| 9      | C <sub>3</sub> N <sub>6</sub> H <sub>7</sub> SO <sub>3</sub> NH <sub>2</sub>                                  | 206 nm <sup>b</sup> | 0.240 @546 nm | 7         |
| 10     | (C <sub>5</sub> H <sub>6</sub> NO)(CH <sub>3</sub> SO <sub>3</sub> )                                          | 252 nm <sup>b</sup> | 0.216 @546 nm | 8         |
| 11     | (C <sub>3</sub> N <sub>6</sub> H <sub>7</sub> )SO <sub>3</sub> CH <sub>3</sub> ·H <sub>2</sub> O              | 233 nm <sup>b</sup> | 0.200 @546 nm | 4         |
| 12     | (3AP)(H <sub>2</sub> PO <sub>4</sub> )                                                                        | 265 nm <sup>b</sup> | 0.196 @546 nm | 5         |
| 13     | BC <sub>2</sub> N <sub>5</sub> H <sub>6</sub> (OH) <sub>2</sub> ·H <sub>2</sub> O                             | 240 nm <sup>a</sup> | 0.181 @546 nm | 9         |
| 14     | (C <sub>5</sub> H <sub>6</sub> N) <sub>2</sub> B <sub>2</sub> O(HPO <sub>4</sub> ) <sub>2</sub>               | 270 nm <sup>b</sup> | 0.156 @546 nm | 10        |
| 15     | (C <sub>3</sub> N <sub>2</sub> H <sub>5</sub> )B <sub>3</sub> O <sub>3</sub> F <sub>2</sub> (OH) <sub>2</sub> | 214 nm <sup>a</sup> | 0.150 @546 nm | 11        |

<sup>a</sup>Transmittance spectrum; <sup>b</sup>Diffuse reflectance spectrum.

**Table S8.** Comparison of experimental birefringence among UV sulfate derivatives that incorporate an additional birefringence-active group (BAG).

| Number | Compound                                                                            | UV cutoff edge      | Birefringence | Reference |
|--------|-------------------------------------------------------------------------------------|---------------------|---------------|-----------|
| 1      | [(4-HP)(4-H <sub>2</sub> P)][3-pySO <sub>3</sub> ]                                  | 279 nm <sup>b</sup> | 0.443 @546 nm | This work |
| 2      | C <sub>3</sub> N <sub>6</sub> H <sub>7</sub> SO <sub>3</sub> NH <sub>2</sub>        | 206 nm <sup>b</sup> | 0.240 @546 nm | 7         |
| 3      | (C <sub>5</sub> H <sub>6</sub> NO)(CH <sub>3</sub> SO <sub>3</sub> )                | 252 nm <sup>b</sup> | 0.216 @546 nm | 8         |
| 4      | Bi(SeO <sub>3</sub> )(CH <sub>3</sub> SO <sub>3</sub> )                             | 277 nm <sup>b</sup> | 0.160 @546 nm | 12        |
| 5      | Bi(TeO <sub>3</sub> )(CH <sub>3</sub> SO <sub>3</sub> )                             | 274 nm <sup>b</sup> | 0.145 @546 nm | 12        |
| 6      | [C(NH <sub>2</sub> ) <sub>3</sub> ] <sub>3</sub> S <sub>3</sub> O <sub>6</sub>      | 218 nm <sup>b</sup> | 0.097 @546 nm | 13        |
| 7      | KNO <sub>3</sub> SO <sub>3</sub> NH <sub>3</sub>                                    | 216 nm <sup>b</sup> | 0.095 @546 nm | 14        |
| 8      | [C(NH <sub>2</sub> ) <sub>3</sub> ] <sub>2</sub> S <sub>2</sub> O <sub>8</sub>      | 222 nm <sup>b</sup> | 0.081 @546 nm | 15        |
| 9      | [C(NH <sub>2</sub> ) <sub>3</sub> ] <sub>2</sub> SO <sub>3</sub> S                  | 254 nm <sup>a</sup> | 0.073 @546 nm | 16        |
| 10     | RbNO <sub>3</sub> SO <sub>3</sub> NH <sub>3</sub>                                   | 208 nm <sup>b</sup> | 0.070 @546 nm | 17        |
| 11     | Sr(NO <sub>3</sub> )(NH <sub>2</sub> SO <sub>3</sub> )·H <sub>2</sub> O             | 290 nm <sup>a</sup> | 0.067 @532 nm | 18        |
| 12     | Na <sub>10</sub> Zn(NO <sub>3</sub> ) <sub>4</sub> (SO <sub>3</sub> S) <sub>4</sub> | 240 nm <sup>b</sup> | 0.013 @550 nm | 19        |

<sup>a</sup>Transmittance spectrum, <sup>b</sup>diffuse reflectance spectrum.



**Table S9.** Birefringence values for selected commercial birefringent crystals.

| Number | Compound           | Birefringence | Reference |
|--------|--------------------|---------------|-----------|
| 1      | TiO <sub>2</sub>   | 0.305 @546 nm | 20        |
| 2      | YVO <sub>4</sub>   | 0.225 @633 nm | 21        |
| 3      | CaCO <sub>3</sub>  | 0.172 @589 nm | 22        |
| 4      | LiNbO <sub>3</sub> | 0.074 @546 nm | 23        |

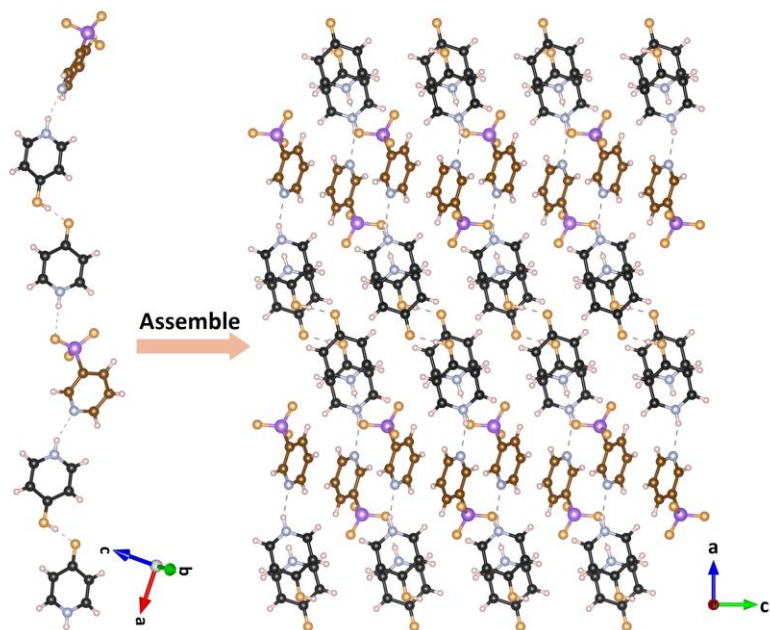

**Fig. S1** One-dimensional (1D)  $[(4\text{-HP})(4\text{-H}_2\text{P})][3\text{-pySO}_3]_\infty$  chains in compound **1**.

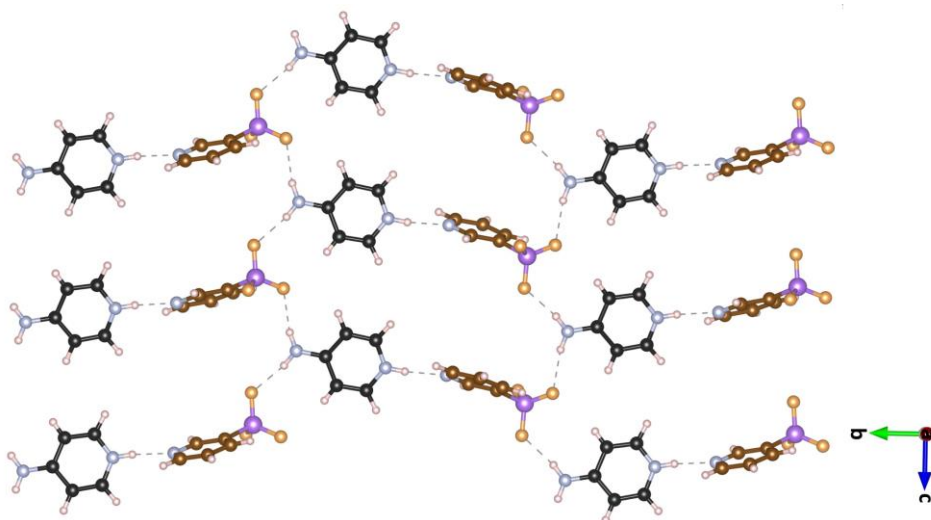

**Fig. S2** The two-dimensional (2D)  $[4\text{-AP}(3\text{-pySO}_3)]_\infty$  layers in compound **2**.

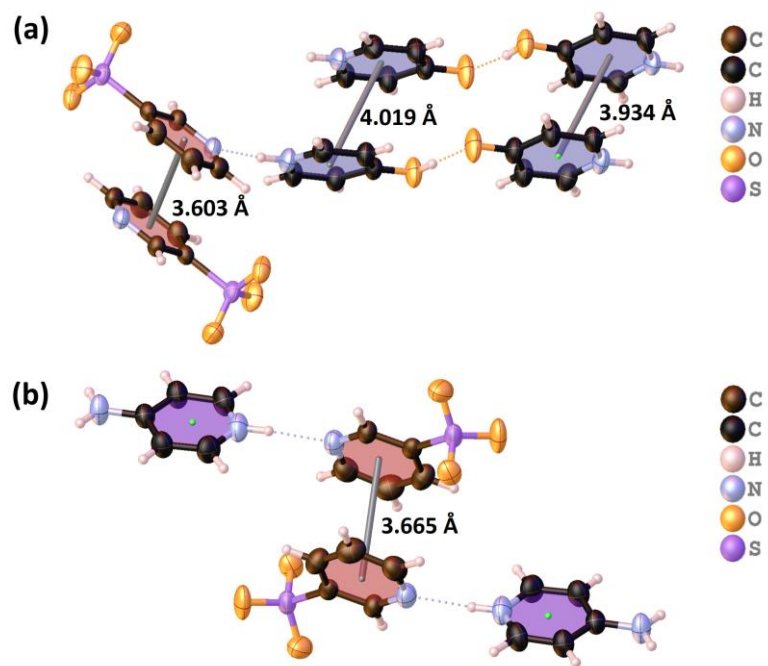

Fig. S3  $\pi$ - $\pi$  interactions in (a) compound 1 and (b) compound 2.

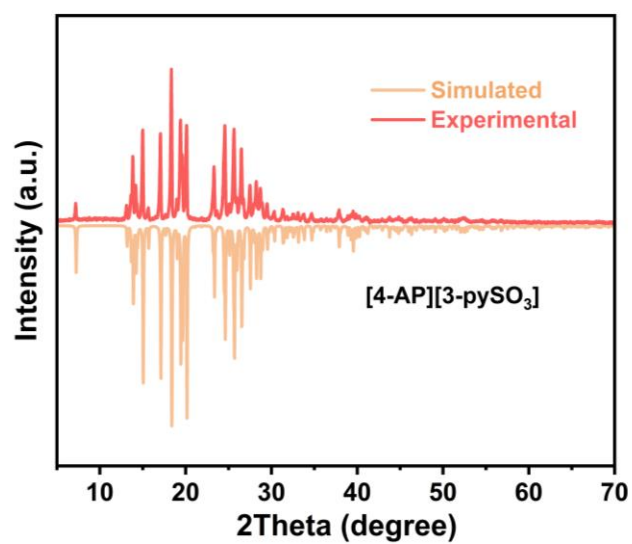

Fig. S4 Simulated and experimental PXR D patterns of compound 2.

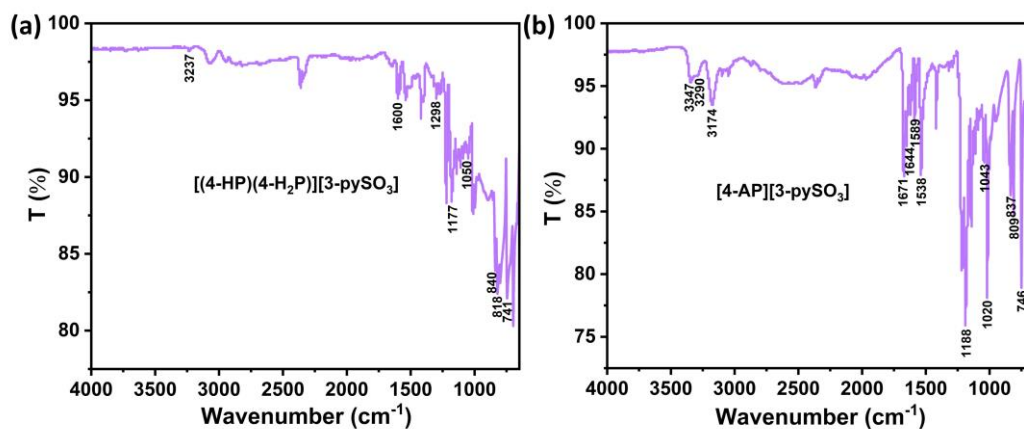

Fig. S5 IR spectra of (a) compound 1 and (b) compound 2.

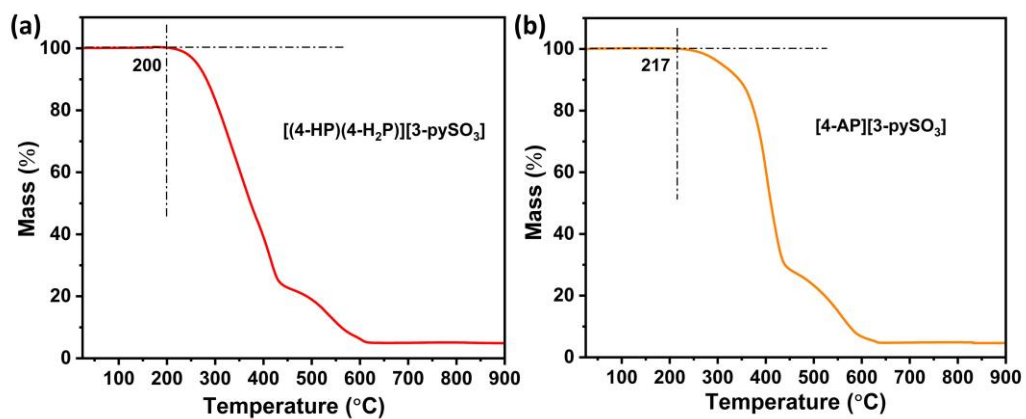

Fig. S6 TGA diagrams of (a) compound 1 and (b) compound 2.

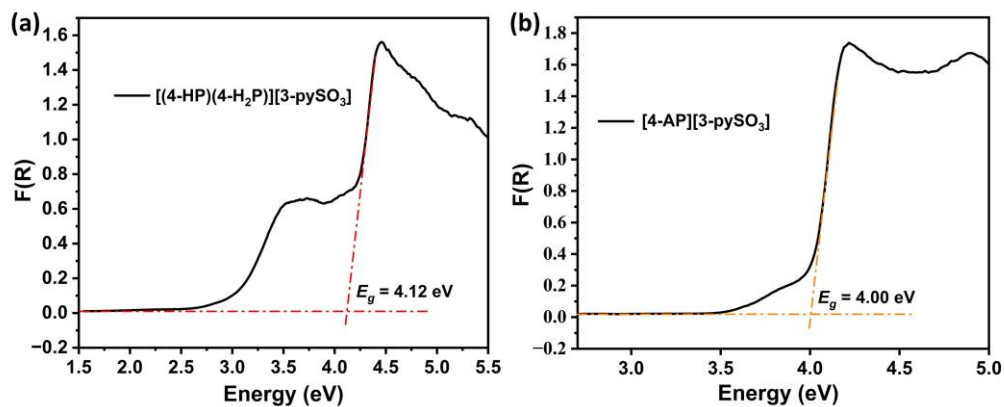

Fig. S7 Experimental band gaps for (a) compound 1 and (b) compound 2.

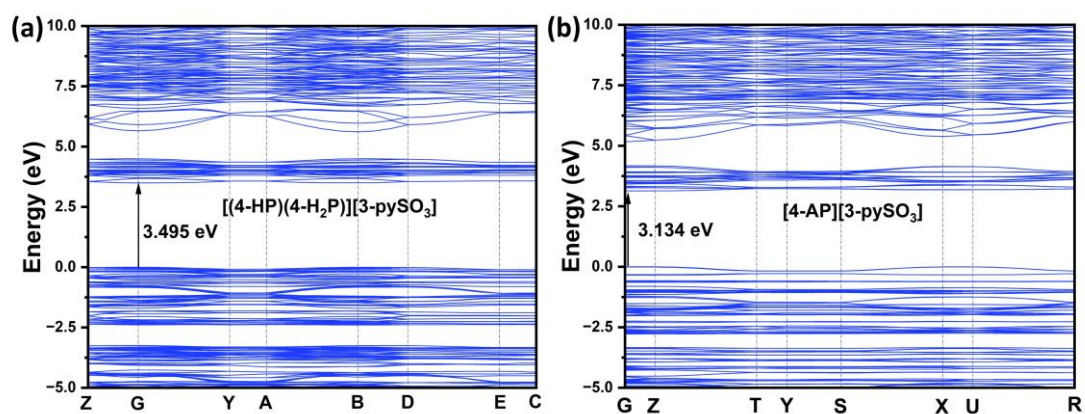

Fig. S8 Calculated band gaps for (a) compound 1 and (b) compound 2.

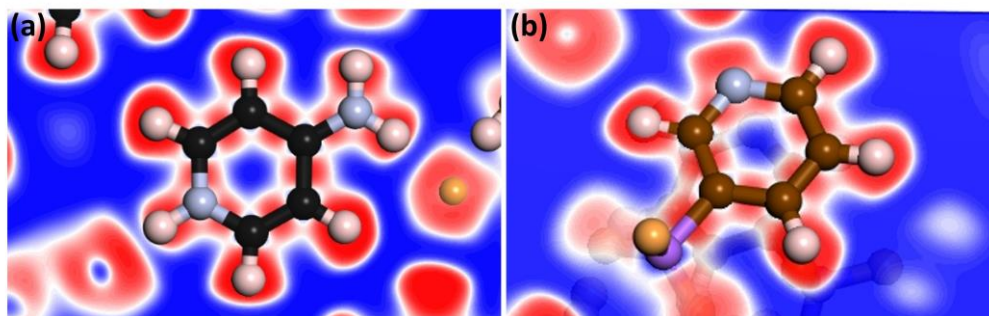

**Fig. S9** ELF diagrams of (a) [4-AP]<sup>+</sup> and (b) [3-pySO<sub>3</sub>]<sup>-</sup> groups in compound **2**.

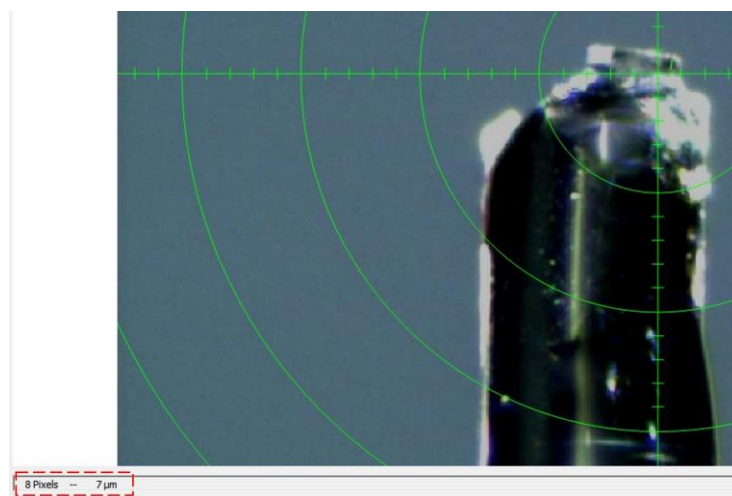

**Fig. S10** Thickness of compound **1** crystal for birefringence measurement.

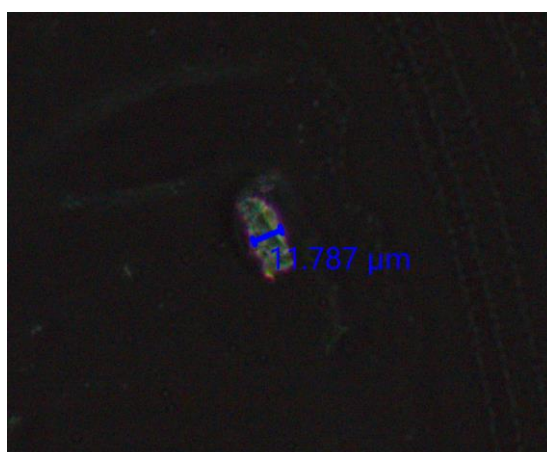

**Fig. S11** Thickness of compound **2** crystal for birefringence measurement.

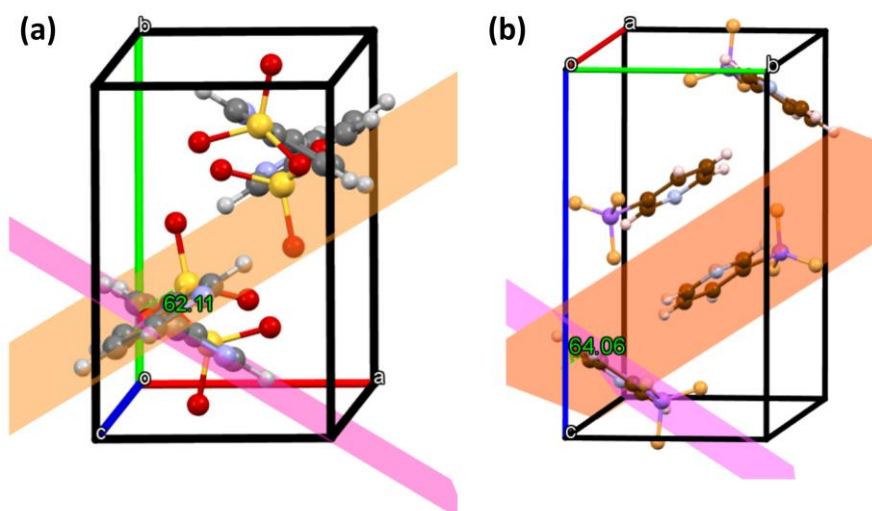

**Fig. S12** Dihedral angle between  $[3\text{-pySO}_3]^-$  groups in (a)  $\text{Li}(3\text{-pySO}_3)\cdot\text{H}_2\text{O}$  and (b) compound **1**.

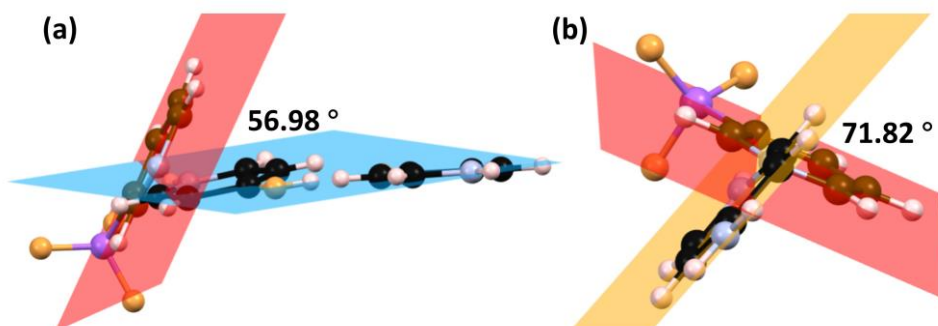

**Fig. S13** (a) Dihedral angle between  $[3\text{-pySO}_3]^-$  and  $[4\text{-HP}/4\text{-H}_2\text{P}]^+$  in compound **1**; (b) Dihedral angle between  $[3\text{-pySO}_3]^-$  and  $[4\text{-AP}]^+$  in compound **2**.



## References

- 1 J. Chen, M. B. Xu, H. Y. Wu, J. Y. Wu and K. Z. Du, *Angew. Chem.-Int. Edit.*, 2024, **63**, e202411503.
- 2 M.-B. Xu, Q.-Q. Chen, B.-X. Li, K.-Z. Du and J. Chen, *Chin. Chem. Lett.*, 2024, DOI: 10.1016/j.ccllet.2024.110513.
- 3 Y. Shen, L. Ma, G. Dong, H. Yu and J. Luo, *Inorg. Chem. Front.*, 2023, **10**, 2022-2029.
- 4 H. Jia, D. Xu, Z. Li, M. Arif, Y. Jiang and X. Hou, *Inorg. Chem. Front.*, 2024, **11**, 8331-8338.
- 5 M.-B. Xu, J. Chen, H.-Y. Wu, J.-J. Li, N. Yu, M.-F. Zhuo, F.-F. Mao and K.-Z. Du, *Inorg. Chem. Front.*, 2024, **11**, 4307-4317.
- 6 L. Liu, C. L. Hu, Z. Bai, F. Yuan, Y. Huang, L. Zhang and Z. Lin, *Chem. Commun.*, 2020, **56**, 14657-14660.
- 7 D. Dou, Q. Shi, Y. Bai, C. Chen, B. Zhang and Y. Wang, *Mat. Chem. Front.*, 2023, **7**, 5924-5931.
- 8 Z. P. Zhang, X. Liu, R. X. Wang, S. Zhao, W. J. He, H. Y. Chen, X. B. Deng, L. M. Wu, Z. Zhou and L. Chen, *Angew. Chem.-Int. Edit.*, 2024, **63**, e202408551.
- 9 H. Fan, C. Lin, F. Liang, H. Tian, S. Huang, Y. Zhou, S. Ke, B. Li, N. Ye and M. Luo, *ACS Appl. Mater. Interfaces*, 2022, **14**, 32270-32278.
- 10 H. L. Zhang, D. X. Jiao, X. F. Li, C. He, X. M. Dong, K. Huang, J. H. Li, X. T. An, Q. Wei and G. M. Wang, *Small*, 2024, **20**, e2401464.
- 11 C. Hu, C. Shen, H. Zhou, J. Han, Z. Yang, K. R. Poepplmeier, F. Zhang and S. Pan, *Small Struct.*, 2024, **5**, 2400296.
- 12 M. Liang, Y. Zhang, E. Izvarin, M. J. Waters, J. M. Rondinelli and P. S. Halasyamani, *Chem. Mat.*, 2024, **36**, 2113-2123.
- 13 H. Sha, D. Yang, Y. Shang, Z. Wang, R. Su, C. He, X. Yang and X. Long, *Chin. Chem. Lett.*, 2024, DOI: 10.1016/j.ccllet.2024.109730.
- 14 H. Tian, C. Lin, X. Zhao, S. Fang, H. Li, C. Wang, N. Ye and M. Luo, *Mater. Today Phys.*, 2022, **28**, 100849.
- 15 M. Zhang, B. Zhang, D. Yang and Y. Wang, *Inorg. Chem. Front.*, 2022, **9**, 6067-6074.
- 16 Y. Liu, X. Liu, Z. Xiong, B. Liu, J. Xu, L. Li, S. Zhao, Z. Lin, M. Hong and J. Luo, *Inorg. Chem.*, 2021, **60**, 14544-14549.
- 17 Y. Song, C. Lin, X. Zhao, T. Yan, N. Ye, H. Tian and M. Luo, *Inorg. Chem. Front.*, 2024, **11**, 4329-4335.
- 18 X. Wang, Y. Li, Z. Chen, J. Lee, F. Zhang, K. R. Poepplmeier, S. Pan and K. M. Ok, *Small Struct.*, 2023, **4**, 2300274.
- 19 Z. Yu, Q. Ding, Y. Jiang, W. Huang, C. Yang, S. Zhao and J. Luo, *Inorg. Chem. Front.*, 2024, **11**, 107-113.
- 20 J. R. DeVore, *J. Opt. Soc. Am.*, 1951, **41**, 416-419.
- 21 H. Luo, T. Tkaczyka, R. Sampsonb and E. L. Dereniaka, *Semicond. Photodetectors III*, 2006, **6119**, 136-142.
- 22 G. Ghosh, *Opt. Commun.*, 1999, **163**, 95-102.
- 23 D. E. Zelmon and D. L. Small, *J. Opt. Soc. Am. B*, 1997, **14**, 3319-3322.
